# Supplementary material for: Evolution of Escherichia coli to 42 °C and Subsequent Genetic Engineering Reveals Adaptive Mechanisms and Novel Mutations
Source: PubMed Central journal article supplement — Mol Biol Evol. 2014 Jul 10;31(10):2647–62. doi: 10.1093/molbev/msu209 (PMC4166923; doi:10.1093/molbev/msu209), 2014-07-10
Supplement: supp_msu209_Supplementary_Tables_1-2.pdf [file supp_msu209_Supplementary_Tables_1-2.pdf]

**Supplementary Table S1 – Mutational similarity comparison with Tenaillon *et al.***

Listed are the 9 functional units found by Tenaillon *et al.* (defined as possessing at least 5 mutations across their 114 evolved strains) that had some level of agreement with the mutations identified in this study. The remaining 17 functional units had no agreement.

| Functional Unit                                                      | Gene        | Number of evolved strains with mutations |                                     |
|----------------------------------------------------------------------|-------------|------------------------------------------|-------------------------------------|
|                                                                      |             | This study (10 total strains)            | Tenaillon study (114 total strains) |
| Extended RNA polymerase complex                                      | <i>rpoC</i> | 5                                        | 21                                  |
|                                                                      | <i>rho</i>  | 1                                        | 45                                  |
|                                                                      | <i>rpoB</i> | 0                                        | 87                                  |
|                                                                      | <i>rpoD</i> | 0                                        | 36                                  |
|                                                                      | <i>nusA</i> | 0                                        | 12                                  |
|                                                                      | <i>rpoA</i> | 0                                        | 4                                   |
| Cardiolipin synthetase                                               | <i>cls</i>  | 1                                        | 64                                  |
| Glycogen synthesis and degradation                                   | <i>glgP</i> | 1                                        | 28                                  |
|                                                                      | <i>glgC</i> | 0                                        | 6                                   |
|                                                                      | <i>glgA</i> | 0                                        | 2                                   |
| Leader peptide regulating isoleucine and valine biosynthesis operons | <i>ilvL</i> | 2                                        | 29                                  |
| General stress response regulators                                   | <i>rpoS</i> | 1                                        | 3                                   |
|                                                                      | <i>cspC</i> | 0                                        | 13                                  |
|                                                                      | <i>rssB</i> | 0                                        | 11                                  |
| Glutamate-related genes                                              | <i>gltP</i> | 1                                        | 7                                   |
|                                                                      | <i>gltT</i> | 1                                        | 0                                   |
|                                                                      | <i>gltF</i> | 1                                        | 0                                   |
|                                                                      | <i>gltL</i> | 0                                        | 3                                   |
| DNA topoisomerase I                                                  | <i>topA</i> | 1                                        | 8                                   |
| <i>dusB-fis</i> operon                                               | <i>dusB</i> | 1                                        | 3                                   |
|                                                                      | <i>fis</i>  | 1                                        | 5                                   |
| Ribosomal proteins                                                   | <i>rpsB</i> | 1                                        | 0                                   |
|                                                                      | <i>rpsR</i> | 0                                        | 5                                   |
|                                                                      | <i>rpsA</i> | 0                                        | 3                                   |

### Supplementary Table S2 – Oligos used to perform MAGE recombineering

Oligos #1-29 correspond with alleles acquired by the non-mutator ALE strains, while oligo #30 was used to determine MAGE recombineering efficiency.

| #  | Oligo name               | Oligo sequence                                                          | Corresponding position in the reference genome (NC_000913.2) |
|----|--------------------------|-------------------------------------------------------------------------|--------------------------------------------------------------|
| 1  | ALE1_cls                 | TGTCGCTGCGCCATTATTCAAGCTTTGCGAGCGTgGTCAGGGGATCGCTGGGGTCAAAGGAATCAGCTA   | 1,306,386-1,306,307                                          |
| 2  | ALE1_yegJ/K              | TCGCTAATCAGCCGTTATATTTATTGTTTAAACTGGCGGTTGAATTGTTtTCTTCAACCGCCATGAGAAA  | 2,149,664-2,149,733                                          |
| 3  | ALE1+4+5+7+9+10_pyrE/rph | GCCTTAAAAATCAGTTTGCCAGCGCCGCCTTCTGCCCGTCCCCTGCACTTCAATGATGCGCCCGTCTTCG  | 3,813,847-3,813,881<br>/3,813,963-3,813,997                  |
| 4  | ALE1_rpoC                | ACCACGCATACCAGCAAGCTGACGAATCTGTGCCaCAGAACCACGCGCACCAGTTCGGCCATCATGTAG   | 4,185,607-4,185,538                                          |
| 5  | ALE1+7_hfq               | CCGACGCAGTGC GTTCAGGAACGGAgCTTGTAAAGATTGCCCTTAGCCATTCTCTCTTTCTTATATG    | 4,398,361-4,398,292                                          |
| 6  | ALE1_nagA                | GAGTACCTGGCAAACATCCGAATCAGGCGTTAGGGCTGAATCTGGTAAAAAAGGCACCCATAATCCGA    | 701,629-701,573<br>/ 701,573-701,539                         |
| 7  | ALE4_mdtG/lpxL           | GATGCTTCAGAATGGCATCCGaCATTACCACAGCAAATCCCCCTGATTTAGCGATAAAAAGCTCTCTGGAT | 1,114,871-1,114,802                                          |
| 8  | ALE4+5+7_pykF            | TTACTACTGCGACCCAGATGCTGGATTCCATGATctAAAACCCACGCCGACTCGCGCAGAAGCCGGTGA   | 1,754,452-1,754,611                                          |
| 9  | ALE4+5_ygaH/mprA         | CACTGTCGTTACTATATCGGCTGAAATTAATGAGGcCATACCCAAATGGATAGTTTCGTTTACGCCATTG  | 2,808,747-2,808,816                                          |
| 10 | ALE4+5+7_mlaE            | TCTGCGGTTAGCGCCGAACCAGCACGCCCGGCAAAAaACAACGCGGCAACCACCGGCCAGTTCACGCA    | 3,336,915-3,336,984                                          |
| 11 | ALE4_rho                 | GTAGGAGCTGTCTGCGGAACGGAGGAAACCAATtCATCCTGCAATATCTCCAGTACGCCATCACCAAAG   | 3,964,655-3,964,586                                          |
| 12 | ALE5_yfjG                | TCCAGAATCCGACTTCCGGTACAACCCGGCAAAAaTGAGGATAAGACTGAACGTCATTACTAACTGAT    | 2,752,626-2,752,695                                          |
| 13 | ALE5+7+10_rpoC           | CGACGCATACGATCCTaGTGGTACGCGTAACCGGTACCTGCCGGGATCAGACGACCCACGATAACGTTCT  | 4,187,492-4,187,418                                          |
| 14 | ALE5_thiG                | TAGTGAATACGGCGATTGCCGTCGCGGACGATCCgGTCAACATGGCGAAGGCATTTTCGCTGGCGGTAGA  | 4,190,054-4,189,985                                          |
| 15 | ALE7_proQ                | CTGCGCGCACAAATCAAAGACATACCCGAATTcAGCgGGACGCGGACCGCTTTTGGTGATTTCTAATAC   | 1,912,877-1,912,946                                          |
| 16 | ALE7_ykfN                | CCAGAAGTTGAAGTATTAACCGATCATAATGAGCgaATTTGTTCGAGCTTTATTGAACACATTGCCAACA  | 262,430-262,361                                              |
| 17 | ALE7_yhjK                | ATAGTGAGCACTTGCTaACCTAAGGTGATTGCGTGCCACGGTTCCTGTACACCGTTGGCAATGACAGCAA  | 3,682,611-3,682,680                                          |
| 18 | ALE9_me                  | ACTTTTATCAGTCTGGCGaGTAGCTATCTGGTTCTGATGCCGAACAACCCGCGCGGGTGGCATTCTC     | 1,143,239-1,143,170                                          |
| 19 | ALE9_yadD                | TCCTGACTTACTTCTTCTCCCTGCTGAATCCCTTTCTCTTCAAACCACTGCGCCAGCGTCATCATAG     | 147,767-147,686                                              |
| 20 | ALE9_barA                | ATGGCCGGGCAAAAAGAGAAGCTGCTTGCGCAGGaATGAGCGATTATCTGGCGAAACCGATTGAAGAAG   | 2,915,332-2,915,401                                          |
| 21 | ALE9_glgP                | GCTTGTAAGCGATAGAGTGCTTAAGAGCTTCTACGaTAAGCGTGGGCGATGAATATGTAAACGGAGCATT  | 3,564,532-3,564,601                                          |
| 22 | ALE10_pykF               | AATGTATCCGTGCACGTAAGTCTTATCACTGCGtCCAGATGCTGGATTCCATGATCAAAAACCCACG     | 1,754,518-1,754,587                                          |
| 23 | ALE10_grpE/nadK          | CGTTTTCTGTTCTTTACTACTCATGAATTTCTCCGtGTTTTTTTCGATTATCTCGCTAACTTCGCTTA    | 2,748,707-2,748,766                                          |
| 24 | ALE10_ygaH/mprA          | TCACTGTCGTTACTATATCGGCTGAAATTAATGAGaTCATACCCAAATGGATAGTTTCGTTTACGCCATT  | 2,808,746-2,808,815                                          |
| 25 | ALE10_yihT               | CCACTCACACGGTCTGGTAAGCATCATTGAGCCAtTCGTCGCCCCACCGGTCGTGGCGATAAATTCGAT   | 4,070,228-4,070,159                                          |
| 26 | ALE10_yiiD/E             | TCCTAACAGCACCAGGATTTAAGTGAAATTAATaTTTTATCACAGACCGGTCAGTACTGCCACCAACCG   | 4,077,053-4,076,984                                          |
| 27 | ALE10_ybiO               | ATTTATTcAGTTTGAACGCGCATGAACACTGGatATTTGGTACTATCGGGCCGTTGACCGGCACAGTG    | 843,006-842,937                                              |
| 28 | ALE4_spr                 | GATTGTTCTGGTTTCGTACAGCGTACATTtGatAGtAATTTGGCTTAGAACTTCGCGTTTCGACTTACG   | 2,268,277-2,268,346                                          |
| 29 | ALE4_dusB                | CAGGAAGACCCCTGGATCTTTCGGGAAATcTAGTgaTaaCTGGACACTGGGGAGTTGCTGCCCCCGCTGC  | 3,408,983-3,409,052                                          |
| 30 | P9 malK84TAG             | ATGTTTTCTGCTACTGACAGGTGGGGATAGAGCGCcTAAGACTGAAACACCATACCAACCGCGTTCTGC   |                                                              |
